# Supplementary material for: Multimodal high-resolution nano-DESI MSI and immunofluorescence imaging reveal molecular signatures of skeletal muscle fiber types
Source: Royal Society of Chemistry journal article supplement (doi:10.1039/d2sc06020e), 2023-01-01
Supplement: d2sc06020e2.xlsx [file d2sc06020e2.xlsx]

## Sheet: Table S1
	140		mouse 1								mouse 2								mouse 3								REPETITIONS
m/z	name	adduct	red	green	black	blue	R-G	R-G-BK	BL enriched	everywhere	red	green	black	blue	R-G	R-G-BK	BL enriched	everywhere	red	green	black	blue	R-G	R-G-BK	BL enriched	everywhere	R-G	R-G-BK	BL enriched	everywhere	metabolism
143.107	Caprylic cid	[M-H]-	93.6774	95.3548	100	95.6129	no pattern	no pattern	no pattern	everywhere	97.8352	99.58	100	96.5428	no pattern	no pattern	no pattern	everywhere	99.0007	97.8635	97.7946	100	no pattern	no pattern	no pattern	everywhere	0	0	0	3	everywhere
145.061	L-Glutamine	[M-H]-	84.4828	86.2732	88.4615	100	no pattern	no pattern	BL	no pattern	97.7716	93.3983	95.6267	100	no pattern	no pattern	no pattern	everywhere	91.61	100	91.3832	87.7875	no pattern	no pattern	no pattern	everywhere	0	0	1	2	everywhere
149.009	Tartaric cid	[M-H]-	99.3602	100	97.1949	84.8917	no pattern	no pattern	no pattern	everywhere	96.5374	95.4128	100	92.4534	no pattern	no pattern	no pattern	everywhere	99.1297	92.2541	98.3464	100	no pattern	no pattern	no pattern	everywhere	0	0	0	3	everywhere
152.022	Creatinine	[M+K]+	52.8302	43.3962	64.1509	100	no pattern	no pattern	BL	no pattern	94.5813	84.298	100	95.5049	no pattern	no pattern	no pattern	everywhere	86.6732	76.9455	81.5175	100	no pattern	no pattern	BL	no pattern	0	0	2	1	glycolytic
152.995	Propanoyl phosphate	[M-H]-	96.3831	97.3208	96.0482	100	no pattern	no pattern	no pattern	everywhere	98.5733	100	99.6109	94.8119	no pattern	no pattern	no pattern	everywhere	100	95.3086	97.284	89.3827	no pattern	no pattern	no pattern	everywhere	0	0	0	3	everywhere
154.062	Histidine	[M-H]-	58.7613	58.3082	62.9909	100	no pattern	no pattern	BL	no pattern	89.9356	83.0113	90.0161	100	no pattern	no pattern	BL	no pattern	87.5949	84.3038	86.0759	100	no pattern	no pattern	BL	no pattern	0	0	3	0	glycolytic
167.021	Uric cid	[M-H]-	100	96.6667	95	90	no pattern	no pattern	no pattern	everywhere	100	89.5954	95.9538	89.0173	no pattern	no pattern	no pattern	everywhere	83.9286	100	91.0714	73.2143	no pattern	no pattern	no pattern	everywhere	0	0	0	3	everywhere
170.092	1-methylhistidine	[M+H]+	64.9688	60.9924	62.4055	100	no pattern	no pattern	BL	no pattern	69.7062	45.8967	87.9433	100	no pattern	no pattern	BL	no pattern	82.5731	57.3684	83.0409	100	no pattern	no pattern	BL	no pattern	0	0	3	0	glycolytic
171.139	FA 10:0	[M-H]-	95.4455	98.4158	100	99.0759	no pattern	no pattern	no pattern	everywhere	96.8895	97.9949	100	96.5296	no pattern	no pattern	no pattern	everywhere	99.5729	98.6935	98.6432	100	no pattern	no pattern	no pattern	everywhere	0	0	0	3	everywhere
175.024	Ascorbic cid	[M-H]-	10.8434	9.48795	15.8133	100	no pattern	no pattern	BL	no pattern	26.2739	18.6306	39.3312	100	no pattern	no pattern	BL	no pattern	26.7773	23.9336	28.1991	100	no pattern	no pattern	BL	no pattern	0	0	3	0	glycolytic
175.119	L-Arginine	[M+H]+	59.0426	59.5745	62.5887	100	no pattern	no pattern	BL	no pattern	88.5812	74.265	94.7593	100	no pattern	no pattern	BL	no pattern	98.332	90.3098	100	91.1835	no pattern	no pattern	no pattern	everywhere	0	0	2	1	glycolytic
180.066	L-Tyrosine	[M-H]-	85.3659	82.9268	87.8049	100	no pattern	no pattern	BL	no pattern	97.2881	93.8983	96.2712	100	no pattern	no pattern	no pattern	everywhere	92.1811	100	88.4774	90.9465	no pattern	no pattern	no pattern	everywhere	0	0	1	2	everywhere
184.001	Phospho-L-serine	[M-H]-	91.8519	100	85.1852	95.5556	no pattern	no pattern	no pattern	everywhere	96.5909	100	78.4091	95.4545	no pattern	no pattern	no pattern	everywhere	98.928	99.2343	98.6217	100	no pattern	no pattern	no pattern	everywhere	0	0	0	3	everywhere
184.094	Carnitine	[M+Na]+	91.2	100	98.3	96.4	no pattern	no pattern	no pattern	everywhere	97.7284	98.738	100	99.8486	no pattern	no pattern	no pattern	everywhere	78.125	92.1875	82.8125	100	no pattern	no pattern	BL	no pattern	0	0	1	2	everywhere
197.139	Butyrylcholine	[M+Na]+	66.6889	60.441	65.4861	100	no pattern	no pattern	BL	no pattern	72.9104	42.4975	88.6203	100	no pattern	no pattern	BL	no pattern	80.854	50.9642	80.3719	100	no pattern	no pattern	BL	no pattern	0	0	3	0	glycolytic
199.17	FA 12:0	[M-H]-	96.7928	97.6866	100	99.1588	no pattern	no pattern	no pattern	everywhere	97.6508	96.8348	100	96.2166	no pattern	no pattern	no pattern	everywhere	99.831	99.4649	99.2115	100	no pattern	no pattern	no pattern	everywhere	0	0	0	3	everywhere
227.114	Carnosine	[M+H]+	55.2025	50.7016	52.8462	100	no pattern	no pattern	BL	no pattern	71.9947	52.9669	83.4246	100	no pattern	no pattern	BL	no pattern	77.2263	52.7564	77.2263	100	no pattern	no pattern	BL	no pattern	0	0	3	0	glycolytic
227.201	FA 14:0	[M-H]-	98.8954	99.289	100	95.7847	no pattern	no pattern	no pattern	everywhere	99.6948	99.1099	100	95.8718	no pattern	no pattern	no pattern	everywhere	99.6236	99.7959	100	98.7752	no pattern	no pattern	no pattern	everywhere	0	0	0	3	everywhere
241.13	Anserine	[M+H]+	65.6113	61.1031	64.1889	100	no pattern	no pattern	BL	no pattern	74.536	55.4295	86.6195	100	no pattern	no pattern	BL	no pattern	82.7535	61.1061	82.4886	100	no pattern	no pattern	BL	no pattern	0	0	3	0	glycolytic
245.043	Phosphatidyl glycerol	[M-H]-	95.2542	94.5763	100	79.322	no pattern	no pattern	no pattern	everywhere	100	95.5128	94.2308	85.8974	no pattern	no pattern	no pattern	everywhere	77.4194	100	69.3548	67.7419	no pattern	no pattern	no pattern	everywhere	0	0	0	3	everywhere
255.233	FA 16:0	[M-H]-	97.1984	97.5563	99.5461	100	no pattern	no pattern	no pattern	everywhere	98.7523	100	98.5924	97.781	no pattern	no pattern	no pattern	everywhere	99.1672	97.0784	99.3536	100	no pattern	no pattern	no pattern	everywhere	0	0	0	3	everywhere
256.155	CAR 6:1	[M-H]-	92.5134	94.1176	100	97.861	no pattern	no pattern	no pattern	everywhere	95.3947	96.9298	100	99.1228	no pattern	no pattern	no pattern	everywhere	95.5307	100	94.9721	98.324	no pattern	no pattern	no pattern	everywhere	0	0	0	3	everywhere
258.171	CAR 6:0	[M-H]-	94.386	96.8421	97.5439	100	no pattern	no pattern	no pattern	everywhere	96.7033	100	97.8022	98.5348	no pattern	no pattern	no pattern	everywhere	95.5684	100	93.2563	94.9904	no pattern	no pattern	no pattern	everywhere	0	0	0	3	everywhere
267.073	Inosine	[M-H]-	100	99.6562	95.4025	94.8598	no pattern	no pattern	no pattern	everywhere	94.4105	91.9368	90.4316	100	no pattern	no pattern	no pattern	everywhere	100	95.1054	98.4897	98.3405	no pattern	no pattern	no pattern	everywhere	0	0	0	3	everywhere
283.264	FA 18:0	[M-H]-	93.259	94.1148	96.5293	100	no pattern	no pattern	no pattern	everywhere	97.6468	100	98.1893	99.006	no pattern	no pattern	no pattern	everywhere	97.7595	98.8004	98.6665	100	no pattern	no pattern	no pattern	everywhere	0	0	0	3	everywhere
297.243	9-hydroxy-12Z-octadecenoic cid	[M-H]-	100	99.6	99.8	95	no pattern	no pattern	no pattern	everywhere	100	98.679	93.1748	86.3056	no pattern	no pattern	no pattern	everywhere	100	95.4433	97.3508	89.403	no pattern	no pattern	no pattern	everywhere	0	0	0	3	everywhere
299.201	FA 20:6	[M-H]-	94.0822	95.1856	97.2919	100	no pattern	no pattern	no pattern	everywhere	92.2078	96.5368	100	97.619	no pattern	no pattern	no pattern	everywhere	97.4099	93.9189	98.6486	100	no pattern	no pattern	no pattern	everywhere	0	0	0	3	everywhere
306.076	Glutathione	[M-H]-	82.7692	81.5856	80.1985	100	no pattern	no pattern	BL	no pattern	86.3181	80.5874	84.6227	100	no pattern	no pattern	BL	no pattern	87.8815	85.6514	89.7887	100	no pattern	no pattern	BL	no pattern	0	0	3	0	glycolytic
317.25	Pregnanolone	[M-H]-	96.0703	97.5181	100	98.4488	no pattern	no pattern	no pattern	everywhere	97.3238	100	97.6806	96.521	no pattern	no pattern	no pattern	everywhere	97.4	100	93.4	92.4	no pattern	no pattern	no pattern	everywhere	0	0	0	3	everywhere
332.957	2-Deoxy-D-ribose 1,5-bisphosphate	[M+K]+	83.4221	88.5139	82.9485	100	no pattern	no pattern	BL	no pattern	89.5506	80.0562	100	93.3708	no pattern	no pattern	no pattern	everywhere	86.5285	86.1831	79.9655	100	no pattern	no pattern	BL	no pattern	0	0	2	1	glycolytic
337.311	FA 22:1	[M-H]-	100	98.4224	97.3707	92.4628	no pattern	no pattern	no pattern	everywhere	97.801	100	96.0209	96.0209	no pattern	no pattern	no pattern	everywhere	100	96.2521	100	99.3186	no pattern	no pattern	no pattern	everywhere	0	0	0	3	everywhere
339.326	FA 22:0	[M-H]-	85.782	88.4676	89.4155	100	no pattern	no pattern	BL	no pattern	96.5443	97.6242	100	97.9482	no pattern	no pattern	no pattern	everywhere	97.318	100	97.7011	98.8506	no pattern	no pattern	no pattern	everywhere	0	0	1	2	everywhere
347.039	Inosine 5'-monophosphateIMP	[M-H]-	100	97.9664	95.0312	94.743	no pattern	no pattern	no pattern	everywhere	95.2141	89.5866	90.086	100	no pattern	no pattern	BL	no pattern	100	97.5613	99.9689	98.5631	no pattern	no pattern	no pattern	everywhere	0	0	1	2	everywhere
347.183	12-oxo-14,18-dihydroxy-9Z,13E,15Z-octadecatrienoic cid	[M+Na]+	81.4077	82.4701	75.4316	100	no pattern	no pattern	no pattern	everywhere	94.5493	83.1237	100	99.2662	no pattern	no pattern	no pattern	everywhere	98.8079	100	93.6185	96.7742	no pattern	no pattern	no pattern	everywhere	0	0	0	3	everywhere
351.22	20-hydroxy LTB4	[M-H]-	94.6309	96.1409	97.651	100	no pattern	no pattern	no pattern	everywhere	94.7619	98.254	100	96.8254	no pattern	no pattern	no pattern	everywhere	97.9109	99.8259	99.6518	100	no pattern	no pattern	no pattern	everywhere	0	0	0	3	everywhere
353.267	MG 16:0	[M+Na]+	86.4341	91.7313	100	80.6202	no pattern	no pattern	no pattern	everywhere	100	80.8853	95.3722	83.9705	no pattern	no pattern	no pattern	everywhere	100	98.617	96.0313	78.7733	no pattern	no pattern	no pattern	everywhere	0	0	0	3	everywhere
367.358	FA 24:0	[M-H]-	83.6862	85.6787	89.5392	100	no pattern	no pattern	no pattern	everywhere	92.7388	94.3962	100	95.1066	no pattern	no pattern	no pattern	everywhere	97.9239	99.1349	99.1926	100	no pattern	no pattern	no pattern	everywhere	0	0	0	3	everywhere
427.284	MG 22:5	[M+Na]+	79.5812	90.5759	79.3194	100	no pattern	no pattern	no pattern	everywhere	90.8946	86.5815	94.5687	100	no pattern	no pattern	BL	no pattern	96.2199	88.8316	90.2062	100	no pattern	no pattern	no pattern	everywhere	0	0	1	2	everywhere
431.228	LPA 18:3	[M-H]-	94.3878	92.8571	98.4694	100	no pattern	no pattern	no pattern	everywhere	93.7984	100	92.2481	84.4961	no pattern	no pattern	no pattern	everywhere	98.7856	100	96.129	95.8254	no pattern	no pattern	no pattern	everywhere	0	0	0	3	everywhere
440.278	LPC 12:0	[M+H]+	81.0056	90.5028	82.1229	100	no pattern	no pattern	BL	no pattern	91.5877	82.4645	95.4	100	no pattern	no pattern	BL	no pattern	85.1351	93.9189	86.4865	100	no pattern	no pattern	BL	no pattern	0	0	3	0	glycolytic
465.243	LPA 22:6	[+H-H2O]	52.7211	50.3401	55.4422	100	no pattern	no pattern	BL	no pattern	74.0947	66.2953	86.0724	100	no pattern	no pattern	BL	no pattern	91.746	80.7937	87.4603	100	no pattern	no pattern	BL	no pattern	0	0	3	0	glycolytic
518.322	LPC 16:0	[M+Na]+	96.5613	100	96.6543	91.7906	no pattern	no pattern	no pattern	everywhere	100	81.1907	99.6312	92.7292	no pattern	no pattern	no pattern	everywhere	100	96.6805	96.5145	93.7759	no pattern	no pattern	no pattern	everywhere	0	0	0	3	everywhere
522.356	LPC 18:0	[M-H]-	89.1811	89.9752	93.7965	100	no pattern	no pattern	BL	no pattern	98.3636	100	97.4545	100	no pattern	no pattern	no pattern	everywhere	96.2016	98.9147	97.9845	100	no pattern	no pattern	no pattern	everywhere	0	0	1	2	everywhere
540.053	cyclic denosine diphosphate ribose	[M-H]-	100	97.6505	93.2873	98.0257	no pattern	no pattern	no pattern	everywhere	79.3651	73.3822	79.6093	100	no pattern	no pattern	BL	no pattern	45.098	25.4902	48.0392	100	no pattern	no pattern	BL	no pattern	0	0	2	1	glycolytic
553.371	Elastin	[M+H]+	79.6649	81.701	79.7938	100	no pattern	no pattern	BL	no pattern	91.8145	82.882	95.3	100	no pattern	no pattern	BL	no pattern	92.8494	88.7968	91.6246	100	no pattern	no pattern	BL	no pattern	0	0	3	0	glycolytic
557.091	Cyanidin 3- 3''-malonylglucoside	[M+Na]+	83.313	81.8514	79.4153	100	no pattern	no pattern	BL	no pattern	93.8125	88.1009	95.6211	100	no pattern	no pattern	BL	no pattern	77.451	67.6471	74.5098	100	no pattern	no pattern	BL	no pattern	0	0	3	0	glycolytic
594.341	PS 22:0	[M-H]-	98.1413	97.9182	100	87.7323	no pattern	no pattern	no pattern	everywhere	100	96.5338	97.978	83.5355	no pattern	no pattern	no pattern	everywhere	100	91.9165	96.1456	87.4197	no pattern	no pattern	no pattern	everywhere	0	0	0	3	everywhere
608.356	PC 16:0/5:0(COOH)	[M-H]-	57.6029	54.2039	66.5474	100	no pattern	no pattern	BL	no pattern	89.5317	78.6501	100	100	no pattern	no pattern	no pattern	everywhere	77.5966	69.9571	84.206	100	no pattern	no pattern	BL	no pattern	0	0	2	1	glycolytic
622.372	PC 22:1;O2	[M-H]-	100	95.8848	53.9095	19.7531	RG	no pattern	no pattern	no pattern	96.6702	100	55.7465	29.0011	RG	no pattern	no pattern	no pattern	100	83.2053	53.6773	30.1866	RG	no pattern	no pattern	no pattern	3	0	0	0	oxidative
667.441	PA 34:4	[M-H]-	50.8982	53.8922	71.8563	100	no pattern	no pattern	BL	no pattern	80.4348	97.8261	100	100	no pattern	no pattern	no pattern	everywhere	84.4037	90.8257	89.9083	100	no pattern	no pattern	BL	no pattern	0	0	2	1	glycolytic
669.456	PA 34:3	[M-H]-	96.6667	94.3333	98.6667	100	no pattern	no pattern	no pattern	everywhere	88.7892	91.9283	100	92.8251	no pattern	no pattern	no pattern	everywhere	98.2774	100	99.456	98.9121	no pattern	no pattern	no pattern	everywhere	0	0	0	3	everywhere
688.392	ox PC 16:0/9:0CHO	[M+K]+	97.1182	100	78.098	91.0663	no pattern	no pattern	no pattern	everywhere	81.4014	100	75.1801	74.1323	no pattern	no pattern	no pattern	everywhere	89.3617	63.8298	100	64.8936	no pattern	no pattern	no pattern	everywhere	0	0	0	3	everywhere
744.494	PC 30:0	[M+K]+	65.8824	53.3333	65.5882	100	no pattern	no pattern	BL	no pattern	40.4494	19.1011	85.3933	100	no pattern	no pattern	BL	no pattern	67.234	42.1277	62.1277	100	no pattern	no pattern	BL	no pattern	0	0	3	0	glycolytic
749.51	PA 38:3	[M+Na]+	89.3082	100	71.3208	15.5975	RG	no pattern	no pattern	no pattern	100	55	30	15	RG	no pattern	no pattern	no pattern	100	89.4231	71.2	49.0385	RG	no pattern	no pattern	no pattern	3	0	0	0	oxidative
754.478	PE 34:2	[M+K]+	87.7327	89.3401	84.4332	100	no pattern	no pattern	BL	no pattern	92.1	93.8502	94.3	100	no pattern	no pattern	BL	no pattern	86.4035	67.1053	73.6842	100	no pattern	no pattern	BL	no pattern	0	0	3	0	glycolytic
756.551	PC 32:0	[M+Na]+	100	94.0349	99.2747	91.267	no pattern	no pattern	no pattern	everywhere	94.7442	85.9846	100	98.7036	no pattern	no pattern	no pattern	everywhere	98.1287	100	96.1589	90.2823	no pattern	no pattern	no pattern	everywhere	0	0	0	3	everywhere
768.495	PC 32:2	[M+K]+	61.1872	53.0594	65.8447	100	no pattern	no pattern	BL	no pattern	44	38	58	100	no pattern	no pattern	BL	no pattern	87.6543	77.7778	86.214	100	no pattern	no pattern	BL	no pattern	0	0	3	0	glycolytic
768.554	PE 36:1	[M+Na]+	58.5837	45.279	66.0944	100	no pattern	no pattern	BL	no pattern	36.8421	33	94.3	100	no pattern	no pattern	BL	no pattern	74.0741	88.9	81.4815	100	no pattern	no pattern	BL	no pattern	0	0	3	0	glycolytic
769.562	SM d36:1	[M+K]+	51.2381	36.1905	58.9206	100	no pattern	no pattern	BL	no pattern	45.5357	19.6429	100	99.1071	no pattern	no pattern	BL	no pattern	68.0272	57.8231	65.9864	100	no pattern	no pattern	BL	no pattern	0	0	3	0	glycolytic
770.51	PC 32:1	[M+K]+	60.2714	54.3374	60.5907	100	no pattern	no pattern	BL	no pattern	66.7373	59.322	88.4	100	no pattern	no pattern	BL	no pattern	77.0791	64.5707	76.2677	100	no pattern	no pattern	BL	no pattern	0	0	3	0	glycolytic
774.45	PE 36:6	[M+K]+	85.8399	88.7423	84.9604	100	no pattern	no pattern	BL	no pattern	100	98.1459	99.8764	94.3552	no pattern	no pattern	no pattern	everywhere	94.883	94.0058	92.5439	100	no pattern	no pattern	BL	no pattern	0	0	2	1	glycolytic
780.551	PC 34:2	[M+Na]+	98.7392	94.8858	100	86.9006	no pattern	no pattern	no pattern	everywhere	100	86.2162	96.4616	80.1997	no pattern	no pattern	no pattern	everywhere	92.5761	96.9657	100	78.4464	no pattern	no pattern	no pattern	everywhere	0	0	0	3	everywhere
784.585	PC 34:0	[M+Na]+	99.3551	100	98.2549	92.0334	no pattern	no pattern	no pattern	everywhere	94.1935	100	85.4839	78.3871	no pattern	no pattern	no pattern	everywhere	95.7724	97.0763	100	85.6578	no pattern	no pattern	no pattern	everywhere	0	0	0	3	everywhere
786.506	PE 38:6	[M+Na]+	100	98.4725	91.446	88.4929	no pattern	no pattern	no pattern	everywhere	100	87.1901	76.0331	84.7107	no pattern	no pattern	no pattern	everywhere	73.6842	100	52.6316	82.8947	no pattern	no pattern	no pattern	everywhere	0	0	0	3	everywhere
794.51	PC 34:3	[M+K]+	78.6078	69.8642	82.6401	100	no pattern	no pattern	BL	no pattern	70.9459	42.9054	97.2973	100	no pattern	no pattern	BL	no pattern	88.8587	77.9891	81.5217	100	no pattern	no pattern	BL	no pattern	0	0	3	0	glycolytic
798.541	PC 34:1	[M+K]+	95.5956	89.0916	95.0583	100	no pattern	no pattern	no pattern	everywhere	90.7634	82.5636	100	87.0562	no pattern	no pattern	no pattern	everywhere	100	92.8215	99.2689	97.4078	no pattern	no pattern	no pattern	everywhere	0	0	0	3	everywhere
802.536	PC 36:5	[M+Na]+	81.5429	72.8911	83.1291	100	no pattern	no pattern	BL	no pattern	99.6894	80.7453	97.5155	100	no pattern	no pattern	no pattern	everywhere	75.8373	73.445	79.1866	100	no pattern	no pattern	BL	no pattern	0	0	2	1	glycolytic
806.512	PE 38:4	[M+K]+	96	90.56	100	98.4	no pattern	no pattern	no pattern	everywhere	73.0435	66.9565	100	79.1304	no pattern	no pattern	no pattern	everywhere	96	62.2222	100	83.5556	no pattern	no pattern	no pattern	everywhere	0	0	0	3	everywhere
820.525	PC 36:4	[M+K]+	68.8551	59.8673	73.2799	100	no pattern	no pattern	BL	no pattern	77.5599	61.9041	95.3	100	no pattern	no pattern	BL	no pattern	72.5781	62.1293	73.883	100	no pattern	no pattern	BL	no pattern	0	0	3	0	glycolytic
828.551	PC 38:6	[M+Na]+	91.8465	85.6313	100	77.6438	no pattern	no pattern	no pattern	everywhere	93.0004	76.7037	99.3331	100	no pattern	no pattern	no pattern	everywhere	100	99.6809	96.6337	96.0913	no pattern	no pattern	no pattern	everywhere	0	0	0	3	everywhere
836.616	PC 38:2	[M+Na]+	90.4718	100	66.05	15.9112	RG	no pattern	no pattern	no pattern	100	85.9649	26.9006	12.8655	RG	no pattern	no pattern	no pattern	100	82.659	66.474	25.7225	RG	no pattern	no pattern	no pattern	3	0	0	0	oxidative
837.547	PI 34:0	[M-H]-	100	93.4	74.3702	28.9157	RG	no pattern	no pattern	no pattern	100	70.1923	54.8077	25	RG	no pattern	no pattern	no pattern	100	76.3	50.7937	14.2857	RG	no pattern	no pattern	no pattern	3	0	0	0	oxidative
846.541	PC 38:5	[M+K]+	96.6155	88.7185	100	97.4266	no pattern	no pattern	no pattern	everywhere	86.5066	68.1426	100	92.9154	no pattern	no pattern	no pattern	everywhere	99.5764	88.9014	91.6973	100	no pattern	no pattern	no pattern	everywhere	0	0	0	3	everywhere
856.583	PC 40:6	[M+Na]+	91.128	100	69.3878	26.1543	RG	no pattern	no pattern	no pattern	100	82.8438	55.5827	35.7862	RG	no pattern	no pattern	no pattern	100	82.9272	67.7248	31.2114	RG	no pattern	no pattern	no pattern	3	0	0	0	oxidative
858.598	PC 40:5	[M+Na]+	91.4003	100	71.6638	27.7358	RG	no pattern	no pattern	no pattern	100	82.3637	54.6954	33.7151	RG	no pattern	no pattern	no pattern	100	82.7721	65.3093	26.5466	RG	no pattern	no pattern	no pattern	3	0	0	0	oxidative
860.611	PC 40:4	[M+Na]+	92.5544	100	61.0538	10.1947	RG	no pattern	no pattern	no pattern	100	99.3103	22.069	11.0345	RG	no pattern	no pattern	no pattern	100	62.5	47.3214	18.75	RG	no pattern	no pattern	no pattern	3	0	0	0	oxidative
861.548	PI 36:2	[M-H]-	91.8638	100	66.8874	26.5847	RG	no pattern	no pattern	no pattern	61.9565	100	55.4348	16.8478	RG	no pattern	no pattern	no pattern	92.9293	100	65.1515	15.1515	RG	no pattern	no pattern	no pattern	3	0	0	0	oxidative
885.549	PI 38:4	[M-H]-	98.4328	100	92.7326	83.2154	no pattern	no pattern	no pattern	everywhere	95.5205	85.898	100	97.6773	no pattern	no pattern	no pattern	everywhere	100	95.0611	99.6237	88.8053	no pattern	no pattern	no pattern	everywhere	0	0	0	3	everywhere
888.554	PC18:0_22:6;O	[M+K]+	78.8265	100	47.7891	6.12245	RG	no pattern	no pattern	no pattern	100	82.5688	21.1009	6.42202	RG	no pattern	no pattern	no pattern	87.5	100	40.625	21.875	RG	no pattern	no pattern	no pattern	3	0	0	0	oxidative
904.56	PC O-44:11	[M+K]+	73.5409	100	44.6174	5.57717	RG	no pattern	no pattern	no pattern	100	54.0984	26.776	7.10383	RG	no pattern	no pattern	no pattern	76.6871	100	50.9202	16.5644	RG	no pattern	no pattern	no pattern	3	0	0	0	oxidative
293.212	9-OxoODE	[M-H]-	100	81.1912	42.3197	10.0313	RG	no pattern	no pattern	no pattern	100	90.2778	57.9167	25.5556	RG	no pattern	no pattern	no pattern	100	75.3676	76.3787	36.7647	no pattern	RGBK	no pattern	no pattern	2	1	0	0	oxidative
322.044	Cytidine 2'-phosphate	[M-H]-	99.3927	100	84.413	34.8178	no pattern	RGBK	no pattern	no pattern	94	85.4545	85.8182	100	no pattern	no pattern	no pattern	everywhere	100	88.5845	97.2603	96.347	no pattern	no pattern	no pattern	everywhere	0	1	0	2	everywhere
323.028	Uridine monophosphate	[M-H]-	99.502	100	90.8865	48.1076	no pattern	RGBK	no pattern	no pattern	97.1618	92.3368	93.3302	100	no pattern	no pattern	no pattern	everywhere	99.8481	100	98.7092	95.0645	no pattern	no pattern	no pattern	everywhere	0	1	0	2	everywhere
368.28	CAR 14:2	[M+H]+	85.1	100	63.5236	6.32754	RG	no pattern	no pattern	no pattern	100	68.5714	47.4286	12	RG	no pattern	no pattern	no pattern	100	90.0433	77.0563	29.0043	no pattern	RGBK	no pattern	no pattern	2	1	0	0	oxidative
426.022	ADP	[M-H]-	83.4919	78.423	79.3116	100	no pattern	no pattern	BL	no pattern	100	94.0084	89.7046	94.0928	no pattern	no pattern	no pattern	everywhere	94.3284	100	92.3881	75.3731	no pattern	RGBK	no pattern	no pattern	0	1	1	1	everywhere
448.341	CAR 18:2	[M+Na]+	78.1407	100	61.0553	6.53266	RG	no pattern	no pattern	no pattern	100	79.5213	60.9043	24.1135	RG	no pattern	no pattern	no pattern	100	68.8889	77.7778	28.8889	no pattern	RGBK	no pattern	no pattern	2	1	0	0	oxidative
557.225	Asp Glu Phe Phe	[M+H]+	87.9712	91.1779	87.4394	100	no pattern	no pattern	BL	no pattern	100	72.5888	73.9425	47.3773	no pattern	RGBK	no pattern	no pattern	95.5049	95.0739	96.4901	100	no pattern	no pattern	no pattern	everywhere	0	1	1	1	everywhere
664.419	PC 16:0/9:0(COOH)	[M-H]-	88.8676	90.2111	100	85.9885	no pattern	no pattern	no pattern	everywhere	94.3159	100	94.5142	77.8586	no pattern	RGBK	no pattern	no pattern	90.2191	93.1925	100	76.7606	no pattern	no pattern	no pattern	everywhere	0	1	0	2	everywhere
667.524	DG 38:4	[M+Na]+	93.75	98.4375	97.3958	100	no pattern	no pattern	no pattern	everywhere	87.8378	47.2973	100	29.7297	no pattern	RGBK	no pattern	no pattern	80.3571	96.4286	100	87.0536	no pattern	no pattern	no pattern	everywhere	0	1	0	2	everywhere
732.481	PC 30:2;O2	[M-H]-	100	100	27.2727	18.1818	RG	no pattern	no pattern	no pattern	73.6842	100	36.8421	15.7895	RG	no pattern	no pattern	no pattern	100	52.6316	73.6842	15.7895	no pattern	RGBK	no pattern	no pattern	2	1	0	0	oxidative
816.548	PE 40:5	[M+Na]+	98.3575	88.6957	100	80.7729	no pattern	no pattern	no pattern	everywhere	100	94.7853	83.1288	84.6626	no pattern	no pattern	no pattern	everywhere	84.507	100	91.5493	69.0141	no pattern	RGBK	no pattern	no pattern	0	1	0	2	everywhere
887.56	PI 38:3	[M-H]-	96.6537	100	87.8974	75.6832	no pattern	RGBK	no pattern	no pattern	88.4793	76.0369	100	85.7143	no pattern	no pattern	no pattern	everywhere	100	88.8403	92.779	78.5558	no pattern	no pattern	no pattern	everywhere	0	1	0	2	everywhere
225.186	FA 14:1	[M-H]-	100	93.4783	89.1304	66.8478	no pattern	RGBK	no pattern	no pattern	96.6346	94.2308	100	69.2308	no pattern	RGBK	no pattern	no pattern	100	99.0205	99.911	98.8424	no pattern	no pattern	no pattern	everywhere	0	2	0	1	oxidative
251.201	FA 16:2	[M-H]-	100	90.3188	78.9847	25.6198	no pattern	RGBK	no pattern	no pattern	100	85.7678	62.9213	29.588	RG	no pattern	no pattern	no pattern	100	90.3371	86.2921	52.5843	no pattern	RGBK	no pattern	no pattern	1	2	0	0	oxidative
329.248	FA 22:5	[M-H]-	100	93.3903	78.8365	37.8857	no pattern	RGBK	no pattern	no pattern	100	91.3265	76.3605	42.6871	no pattern	RGBK	no pattern	no pattern	100	82.7586	53.4483	27.0115	RG	no pattern	no pattern	no pattern	1	2	0	0	oxidative
542.322	LPC 18:2	[M+Na]+	91.9442	100	86.7545	41.2858	no pattern	RGBK	no pattern	no pattern	100	80.7299	63.5036	36.7883	RG	no pattern	no pattern	no pattern	100	79.8319	90.7563	32.7731	no pattern	RGBK	no pattern	no pattern	1	2	0	0	oxidative
568.34	LPC 20:3	[M+Na]+	87.1833	100	80.924	32.7869	no pattern	RGBK	no pattern	no pattern	95.2267	84.7961	100	99.3181	no pattern	no pattern	no pattern	everywhere	100	92.8571	82.1429	76.4286	no pattern	RGBK	no pattern	no pattern	0	2	0	1	oxidative
599.32	LPI 18:0	[M-H]-	98.1716	100	92.5457	88.6076	no pattern	RGBK	no pattern	no pattern	93.5606	100	88.2576	75	no pattern	RGBK	no pattern	no pattern	97.2281	98.2942	100	93.6034	no pattern	no pattern	no pattern	everywhere	0	2	0	1	oxidative
673.426	DG 38:9	[M+K]+	100	88.1266	90.7652	75.9894	no pattern	RGBK	no pattern	no pattern	100	74.0741	97.2222	80.5556	no pattern	no pattern	no pattern	everywhere	97.929	92.1598	100	82.3964	no pattern	RGBK	no pattern	no pattern	0	2	0	1	oxidative
732.422	ox PC 18:0/9:0(COOH)	[M+K]+	92.6113	100	85.83	50.1012	no pattern	RGBK	no pattern	no pattern	51.8519	55.5556	74.0741	100	no pattern	no pattern	BL	no pattern	100	71.1864	92.6554	46.3277	no pattern	RGBK	no pattern	no pattern	0	2	1	0	oxidative
745.503	PG 34:2	[M-H]-	100	92.944	83.9416	31.3869	no pattern	RGBK	no pattern	no pattern	100	76.7442	55.814	34.8837	RG	no pattern	no pattern	no pattern	100	77.5758	85.4545	24.2424	no pattern	RGBK	no pattern	no pattern	1	2	0	0	oxidative
810.601	PC 36:1	[M+Na]+	94.4767	100	83.098	61.3372	no pattern	RGBK	no pattern	no pattern	85.2697	100	33.61	11.2033	RG	no pattern	no pattern	no pattern	100	89.5668	93.7224	63.2773	no pattern	RGBK	no pattern	no pattern	1	2	0	0	oxidative
812.616	PC 36:0	[M+Na]+	84.7458	100	61.2994	27.1186	RG	no pattern	no pattern	no pattern	100	96.4	97.8723	75.7	no pattern	RGBK	no pattern	no pattern	100	72.3684	80.2632	31.9079	no pattern	RGBK	no pattern	no pattern	1	2	0	0	oxidative
834.528	PS 40:6	[M-H]-	96.7525	100	85.0691	71.5939	no pattern	RGBK	no pattern	no pattern	100	95.966	94.9045	93.4183	no pattern	no pattern	no pattern	everywhere	100	93.1638	91.7329	80.7631	no pattern	RGBK	no pattern	no pattern	0	2	0	1	oxidative
834.598	PC 38:3	[M+Na]+	91.2314	100	72.0446	31.9346	no pattern	RGBK	no pattern	no pattern	100	79.1876	62.8385	44.1324	RG	no pattern	no pattern	no pattern	100	85.5879	73.603	37.9772	no pattern	RGBK	no pattern	no pattern	1	2	0	0	oxidative
146.045	L-Glutamate	[M-H]-	99.1408	99.6034	100	72.7032	no pattern	RGBK	no pattern	no pattern	97.8578	100	89.7138	76.6944	no pattern	RGBK	no pattern	no pattern	90.3801	100	90.9802	81.7421	no pattern	RGBK	no pattern	no pattern	0	3	0	0	oxidative
151.026	Xanthine	[M-H]-	86.8421	97.3684	100	55.2632	no pattern	RGBK	no pattern	no pattern	100	96.0733	97.1204	70.9424	no pattern	RGBK	no pattern	no pattern	67.3913	100	74.13	51.087	no pattern	RGBK	no pattern	no pattern	0	3	0	0	oxidative
253.217	FA 16:1	[M-H]-	100	96.4293	93.689	81.9182	no pattern	RGBK	no pattern	no pattern	100	97.8124	94.29	78.7171	no pattern	RGBK	no pattern	no pattern	99.0648	97.1212	100	81.2	no pattern	RGBK	no pattern	no pattern	0	3	0	0	oxidative
277.217	FA 18:3	[M-H]-	100	91.072	79.5739	41.8668	no pattern	RGBK	no pattern	no pattern	100	91.2414	75.476	46.3062	no pattern	RGBK	no pattern	no pattern	100	89.8611	88.4028	59.6528	no pattern	RGBK	no pattern	no pattern	0	3	0	0	oxidative
279.233	FA 18:2	[M-H]-	100	90.989	78.1148	33.2141	no pattern	RGBK	no pattern	no pattern	100	92.5645	77.5855	49.9363	no pattern	RGBK	no pattern	no pattern	100	90.8582	86.4422	56.3843	no pattern	RGBK	no pattern	no pattern	0	3	0	0	oxidative
281.248	FA 18:1	[M-H]-	100	92.4497	82.8236	46.6988	no pattern	RGBK	no pattern	no pattern	100	94.6601	86.0102	62.1443	no pattern	RGBK	no pattern	no pattern	100	93.5565	93.4937	76.7273	no pattern	RGBK	no pattern	no pattern	0	3	0	0	oxidative
295.227	9-HODE	[M-H]-	100	90.8267	71.6874	25.8211	no pattern	RGBK	no pattern	no pattern	100	91.0231	75.931	52.6852	no pattern	RGBK	no pattern	no pattern	100	79.8588	80.4162	51.728	no pattern	RGBK	no pattern	no pattern	0	3	0	0	oxidative
303.233	FA 20:4	[M-H]-	100	94.6373	83.3104	54.0736	no pattern	RGBK	no pattern	no pattern	100	94.7588	95.2353	70.5182	no pattern	RGBK	no pattern	no pattern	96.1538	100	88.5628	69.9393	no pattern	RGBK	no pattern	no pattern	0	3	0	0	oxidative
305.248	FA 20:3	[M-H]-	100	91.7487	77.3854	39.1511	no pattern	RGBK	no pattern	no pattern	100	87.5648	83.6788	40.1554	no pattern	RGBK	no pattern	no pattern	100	77.2727	64.4628	35.5372	no pattern	RGBK	no pattern	no pattern	0	3	0	0	oxidative
307.264	FA 20:2	[M-H]-	100	90.8537	77.168	29.4038	no pattern	RGBK	no pattern	no pattern	100	66.6667	53.3333	22.6667	no pattern	RGBK	no pattern	no pattern	100	81.9608	73.3333	50.5882	no pattern	RGBK	no pattern	no pattern	0	3	0	0	oxidative
309.28	FA 20:1	[M-H]-	100	92.7761	79.9556	36.8836	no pattern	RGBK	no pattern	no pattern	100	94.9519	81.4904	55.609	no pattern	RGBK	no pattern	no pattern	100	90.7067	84.6079	65.6341	no pattern	RGBK	no pattern	no pattern	0	3	0	0	oxidative
327.233	FA 22:6	[M-H]-	100	96.9874	82.2367	48.0887	no pattern	RGBK	no pattern	no pattern	100	99.5293	89.9126	68.9307	no pattern	RGBK	no pattern	no pattern	100	88.9474	74.4737	43.9474	no pattern	RGBK	no pattern	no pattern	0	3	0	0	oxidative
331.264	FA 22:4	[M-H]-	100	94.6812	81.0819	41.0698	no pattern	RGBK	no pattern	no pattern	97.9482	100	98.0022	79.63	no pattern	RGBK	no pattern	no pattern	100	96.0674	89.7004	68.4	no pattern	RGBK	no pattern	no pattern	0	3	0	0	oxidative
346.055	Adenosine monophosphate	[M-H]-	100	99.7188	87.2444	70.8461	no pattern	RGBK	no pattern	no pattern	98.7719	100	87.4661	77.7858	no pattern	RGBK	no pattern	no pattern	87.6596	100	86.9976	65.0591	no pattern	RGBK	no pattern	no pattern	0	3	0	0	oxidative
362.05	Guanosine 3'-phosphate	[M-H]-	100	98.1206	91.5427	45.184	no pattern	RGBK	no pattern	no pattern	100	97.4212	90.8309	79	no pattern	RGBK	no pattern	no pattern	93.75	100	93.192	80.1339	no pattern	RGBK	no pattern	NO pattern	0	3	0	0	oxidative
377.265	MG 18:2	[M+Na]+	58.9431	60.1626	100	10.1626	no pattern	RGBK	no pattern	no pattern	100	50	67.5	14.8607	no pattern	RGBK	no pattern	no pattern	71.7077	100	71.9	18.5239	no pattern	RGBK	no pattern	no pattern	0	3	0	0	oxidative
379.281	MG 18:1	[M+Na]+	69.4737	76.3158	100	34.7368	no pattern	RGBK	no pattern	no pattern	100	72.1264	80.7471	48.8506	no pattern	RGBK	no pattern	no pattern	85.2355	100	76.5399	42.7536	no pattern	RGBK	no pattern	no pattern	0	3	0	0	oxidative
400.342	CAR 16:0	[M+H]+	92.25	100	96.7529	29.4685	no pattern	RGBK	no pattern	no pattern	100	79.2039	90.2952	54.6064	no pattern	RGBK	no pattern	no pattern	99.393	100	98.6849	65.7562	no pattern	RGBK	no pattern	no pattern	0	3	0	0	oxidative
446.325	CAR 18:1	[M+Na]+	80.8955	100	70.2488	10.0498	no pattern	RGBK	no pattern	no pattern	100	72.4586	72.9314	29.4326	no pattern	RGBK	no pattern	no pattern	100	63.7363	89.011	30.2198	no pattern	RGBK	no pattern	no pattern	0	3	0	0	oxidative
480.309	LPE 18:0	[M-H]-	100	97.7169	90.1826	59.8174	no pattern	RGBK	no pattern	no pattern	100	94.3262	73.7589	54.9645	no pattern	RGBK	no pattern	no pattern	100	93.9597	85.2349	47.651	no pattern	RGBK	no pattern	no pattern	0	3	0	0	oxidative
524.278	LPE 22:6	[M-H]-	100	99.9085	86.3678	48.9478	no pattern	RGBK	no pattern	no pattern	100	96.5375	84.5837	76.9167	no pattern	RGBK	no pattern	no pattern	100	96.3855	72.8916	43.3735	no pattern	RGBK	no pattern	no pattern	0	3	0	0	oxidative
546.353	LPC 18:0	[M+Na]+	90.3209	100	79.8527	62.4408	no pattern	RGBK	no pattern	no pattern	100	81.6007	71.4811	60.8096	no pattern	RGBK	no pattern	no pattern	100	97.271	87.7193	49.1228	no pattern	RGBK	no pattern	no pattern	0	3	0	0	oxidative
636.387	PC 18:0/5:0(COOH)	[M-H]-	100	93.5644	94.0594	83.6634	no pattern	RGBK	no pattern	no pattern	100	95.122	87.3171	68.9431	no pattern	RGBK	no pattern	no pattern	100	91.2921	87.3596	71.3483	no pattern	RGBK	no pattern	no pattern	0	3	0	0	oxidative
723.478	CL 72:8	[M-2H]2-	100	99.0426	70.9574	25.3191	no pattern	RGBK	no pattern	no pattern	100	72.549	64.7059	25.4902	no pattern	RGBK	no pattern	no pattern	100	62.2754	76.0479	15.5689	no pattern	RGBK	no pattern	no pattern	0	3	0	0	oxidative
724.484	CL 72:7	[M-2H]2-	96.6171	100	73.3424	27.8755	no pattern	RGBK	no pattern	no pattern	100	66.6667	55.5556	33.3333	no pattern	RGBK	no pattern	no pattern	100	57.6271	77.9661	16.9492	no pattern	RGBK	no pattern	no pattern	0	3	0	0	oxidative
747.519	PG 34:1	[M-H]-	100	98.4529	90.8111	62.541	no pattern	RGBK	no pattern	no pattern	100	92.029	91.5942	70.7246	no pattern	RGBK	no pattern	no pattern	100	87.3633	93.5601	56.6221	no pattern	RGBK	no pattern	no pattern	0	3	0	0	oxidative
748.522	PC P-36:5	[M-H]-	100	97.5217	90.5824	54.7708	no pattern	RGBK	no pattern	no pattern	100	82.3529	90.7563	57.9832	no pattern	RGBK	no pattern	no pattern	100	74.2972	90.3614	38.9558	no pattern	RGBK	no pattern	no pattern	0	3	0	0	oxidative
810.506	PE 42:11	[M+H]+	100	90.4584	93.1712	55.0047	no pattern	RGBK	no pattern	no pattern	100	88.7	91.7526	67.0103	no pattern	RGBK	no pattern	no pattern	92.9134	84.252	100	44.0945	no pattern	RGBK	no pattern	no pattern	0	3	0	0	oxidative
824.557	PC 36:2	[M+K]+	94.8554	100	83.6953	51.0045	no pattern	RGBK	no pattern	no pattern	100	82.9567	70.1741	40.8299	no pattern	RGBK	no pattern	no pattern	100	87.7497	86.6943	40.1432	no pattern	RGBK	no pattern	no pattern	0	3	0	0	oxidative
830.51	PE 40:6	[M+K]+	100	97.3423	92.7916	63.5755	no pattern	RGBK	no pattern	no pattern	100	83.7014	85.377	67.8599	no pattern	RGBK	no pattern	no pattern	100	76.6707	86.8773	59.5383	no pattern	RGBK	no pattern	no pattern	0	3	0	0	oxidative
832.583	PC 38:4	[M+Na]+	100	96.6035	93.9982	67.2341	no pattern	RGBK	no pattern	no pattern	100	79.928	81.7648	67.3925	no pattern	RGBK	no pattern	no pattern	100	91.1748	92.4802	64.0375	no pattern	RGBK	no pattern	no pattern	0	3	0	0	oxidative
835.532	PI 34:1	[M-H]-	97.539	100	87.455	70.2881	no pattern	RGBK	no pattern	no pattern	100	83.1224	99.5781	79.7468	no pattern	RGBK	no pattern	no pattern	100	87.0769	91.0769	59.3846	no pattern	RGBK	no pattern	no pattern	0	3	0	0	oxidative
852.551	PC 40:8	[M+Na]+	100	99.1446	95.7462	54.4677	no pattern	RGBK	no pattern	no pattern	100	81.0837	77.1757	62.89	no pattern	RGBK	no pattern	no pattern	100	90.8612	87.4341	54.2619	no pattern	RGBK	no pattern	no pattern	0	3	0	0	oxidative
854.567	PC 40:7	[M+Na]+	100	99.5462	93.8028	60.7042	no pattern	RGBK	no pattern	no pattern	100	80.8773	71.3502	48.4578	no pattern	RGBK	no pattern	no pattern	100	86.6207	86	57.8621	no pattern	RGBK	no pattern	no pattern	0	3	0	0	oxidative
909.548	PI 40:6	[M-H]-	97.151	100	78.8224	57.8348	no pattern	RGBK	no pattern	no pattern	100	90.411	93.1507	71.2329	no pattern	RGBK	no pattern	no pattern	100	75.3846	63.0769	61.5385	no pattern	no pattern	no pattern	everywhere	0	2	0	1	oxidative

## Sheet: Table S2
				Z-scores
				mouse 1				mouse 2				mouse 3
m/z	adduct	name	metabolism
				-1.5	1.5
295.227	[M-H]-	9-HODE	oxidative	0.567619	0.845427	-0.012004	-1.40104	0.537154	0.971045	-0.192314	-1.31588	0.0935472	1.1076	0.121611	-1.32276
293.212	[M-H]-	9-OxoODE	oxidative	0.567306	1.03519	-0.399648	-1.20284	0.646594	0.934427	-0.311476	-1.26955	0.12376	1.06469	0.162381	-1.35083
368.28	[M+H]+	CAR 14:2	oxidative	0.978097	0.348985	0.0579033	-1.38499	0.313027	1.16322	-0.258923	-1.21733	0.509292	0.825879	0.0963526	-1.43152
400.342	[M+H]+	CAR 16:0	oxidative	0.606908	0.376139	0.510222	-1.49327	-0.0931942	0.970248	0.473975	-1.35103	0.537858	0.50175	0.459624	-1.49923
446.325	[M+Na]+	CAR 18:1	oxidative	0.966135	0.418554	-0.00944106	-1.37525	0.415152	1.05025	-0.162212	-1.30319	0	1.04738	0.299253	-1.34664
448.341	[M+Na]+	CAR 18:2	oxidative	0.89357	0.401626	0.12747	-1.42267	0.128633	1.07262	0.144839	-1.34609	-0.226065	0.944155	0.589543	-1.30763
724.484	[M-2H]2-	CL 72:7	oxidative	0.768402	0.666626	-0.0335858	-1.40144	0.1	1.3	-0.3	-1.1	-0.15596	1.04373	0.419893	-1.30767
723.478	[M-2H]2-	CL 72:8	oxidative	0.71967	0.747	-0.0819878	-1.38468	0.223001	1.115	-0.0318573	-1.30615	-0.0337004	1.02786	0.353854	-1.34802
225.186	[M-H]-	FA 14:1	oxidative	0.424932	0.878193	0.122758	-1.42588	0.299142	0.47008	0.709393	-1.47861	-0.708745	0.932559	0.783349	-1.00716
253.217	[M-H]-	FA 16:1	oxidative	0.436669	0.892554	0.0868037	-1.41603	0.531078	0.758546	0.164817	-1.45444	0.0708155	0.561393	0.797444	-1.42965
251.201	[M-H]-	FA 16:2	oxidative	0.499578	0.791147	0.158229	-1.44896	0.527299	0.99059	-0.216406	-1.30148	0.38941	0.857792	0.193344	-1.44055
281.248	[M-H]-	FA 18:1	oxidative	0.506626	0.826545	0.0987524	-1.43192	0.535332	0.854502	0.0183247	-1.40816	0.262329	0.909433	0.256022	-1.42778
279.233	[M-H]-	FA 18:2	oxidative	0.51994	0.823986	0.0855456	-1.42947	0.567108	0.903296	-0.110142	-1.36026	0.393742	0.877736	0.159943	-1.43142
277.217	[M-H]-	FA 18:3	oxidative	0.506029	0.85506	0.0565192	-1.41761	0.550389	0.921619	-0.117825	-1.35418	0.31045	0.895297	0.226328	-1.43208
309.28	[M-H]-	FA 20:1	oxidative	0.544026	0.799679	0.0903075	-1.43401	0.600875	0.854936	-0.0766216	-1.37919	0.376675	1.01669	-0.0433343	-1.35003
307.264	[M-H]-	FA 20:2	oxidative	0.525346	0.816605	0.0895353	-1.43149	0.187229	1.22739	-0.228836	-1.18579	0.267521	1.14652	-0.152869	-1.26117
305.248	[M-H]-	FA 20:3	oxidative	0.544581	0.850731	0.0116538	-1.40697	0.372568	0.849454	0.223541	-1.44556	0.295807	1.14097	-0.180557	-1.25622
303.233	[M-H]-	FA 20:4	oxidative	0.5673	0.82884	0.0148793	-1.41102	0.34855	0.74305	0.384414	-1.47601	0.848696	0.560746	-0.00757764	-1.40186
331.264	[M-H]-	FA 22:4	oxidative	0.580722	0.780346	0.0703218	-1.43139	0.782058	0.336841	0.348558	-1.46746	0.531058	0.9684	-0.177019	-1.32244
329.248	[M-H]-	FA 22:5	oxidative	0.569196	0.806376	0.0469498	-1.42252	0.544174	0.887863	-0.0488577	-1.38318	0.526199	1.06132	-0.383501	-1.20401
327.233	[M-H]-	FA 22:6	oxidative	0.637086	0.763697	0.0171701	-1.41795	0.683455	0.715835	0.0219723	-1.42126	0.498296	0.953261	-0.0974926	-1.35406
546.353	[M+Na]+	LPC 18:0	oxidative	1.04808	0.445903	-0.205361	-1.28862	0.187589	1.29105	-0.419316	-1.05932	0.583962	0.699926	0.178088	-1.46198
542.322	[M+Na]+	LPC 18:2	oxidative	0.758413	0.452992	0.256231	-1.46764	0.390352	1.10849	-0.251621	-1.24722	0.133626	0.80879	0.49934	-1.44176
568.34	[M+Na]+	LPC 20:3	oxidative	0.843193	0.407015	0.193998	-1.44421	0.224074	1.32276	-0.730046	-0.816784	0.472657	1.14788	-0.540179	-1.08036
480.309	[M-H]-	LPE 18:0	oxidative	0.581391	0.704436	0.17534	-1.46117	0.659589	0.935495	-0.340572	-1.25451	0.521163	0.778175	0.149924	-1.44926
524.278	[M-H]-	LPE 22:6	oxidative	0.668007	0.671802	0.106274	-1.44608	0.657961	0.982118	-0.461152	-1.17893	0.697618	0.835988	-0.20179	-1.33182
599.32	[M-H]-	LPI 18:0	oxidative	0.989665	0.63958	-0.437607	-1.19164	1.01678	0.410278	-0.089191	-1.33786	0.374449	-0.0197079	1.0051	-1.35984
732.422	[M+K]+	ox PC 18:0/9:0(COOH)	oxidative	0.807379	0.473449	0.166965	-1.44779	0.598585	0.835955	-0.0412817	-1.39326	-0.263349	0.930498	0.626184	-1.29333
888.554	[M+K]+	PC18:0_22:6;O	oxidative	1.02497	0.505971	-0.254809	-1.27613	0.657249	1.03855	-0.687352	-1.00845	1.00702	0.671345	-0.587427	-1.09094
749.51	[M+Na]+	PA 38:3	oxidative	0.823998	0.539284	0.0602926	-1.42357	0.134433	1.34433	-0.537733	-0.941033	0.500948	0.980115	-0.152462	-1.3286
812.616	[M+Na]+	PC 36:0	oxidative	0.999358	0.518598	-0.220348	-1.29761	1.35271	0.159998	-0.74181	-0.770901	0.0431056	1.00867	0.318981	-1.37076
810.601	[M+Na]+	PC 36:1	oxidative	0.892679	0.569834	-0.0952757	-1.36724	0.956624	0.707843	-0.51711	-1.14736	0.181058	0.826848	0.438279	-1.44619
824.557	[M+K]+	PC 36:2	oxidative	0.80044	0.566615	0.0593798	-1.42644	0.379157	1.06179	-0.132816	-1.30813	0.345201	0.809757	0.305178	-1.46014
836.616	[M+Na]+	PC 38:2	oxidative	0.847716	0.594446	-0.0547112	-1.38745	0.687197	1.01379	-0.687197	-1.01379	0.439043	0.985004	-0.0705199	-1.35353
834.598	[M+Na]+	PC 38:3	oxidative	0.865887	0.576062	-0.0581084	-1.38384	0.321718	1.19721	-0.36602	-1.15291	0.426158	0.969885	-0.025994	-1.37005
832.583	[M+Na]+	PC 38:4	oxidative	0.475703	0.701848	0.302236	-1.47979	-0.174429	1.31967	-0.0377048	-1.10753	0.270035	0.83054	0.352943	-1.45352
860.611	[M+Na]+	PC 40:4	oxidative	0.834048	0.651666	-0.119951	-1.36576	0.855063	0.869374	-0.747733	-0.976704	0.158297	1.26638	-0.290212	-1.13446
858.598	[M+Na]+	PC 40:5	oxidative	0.84683	0.580074	-0.0321429	-1.39476	0.500015	1.10113	-0.443027	-1.15812	0.448902	0.996798	-0.106466	-1.33923
856.583	[M+Na]+	PC 40:6	oxidative	0.859733	0.590517	-0.069176	-1.38107	0.501603	1.10379	-0.455267	-1.15012	0.425262	1.00789	-0.0935429	-1.33961
854.567	[M+Na]+	PC 40:7	oxidative	0.588334	0.612535	0.282067	-1.48294	0.266309	1.1588	-0.178339	-1.24677	0.225679	0.980537	0.19066	-1.39688
852.551	[M+Na]+	PC 40:8	oxidative	0.536798	0.575695	0.382263	-1.49476	0.0520773	1.28905	-0.203477	-1.13765	0.386697	0.844352	0.215076	-1.44612
636.387	[M-H]-	PC 18:0/5:0(COOH)	oxidative	0.109691	1.06035	0.182818	-1.35285	0.533409	0.891002	-0.0387392	-1.38567	0.316184	1.04224	-0.0117105	-1.34671
622.372	[M-H]-	PC 22:1;O2	oxidative	0.750434	0.8588	-0.354898	-1.25434	0.868569	0.771012	-0.42799	-1.21159	0.530155	1.07182	-0.422177	-1.17979
904.56	[M+K]+	PC O-44:11	oxidative	1.08861	0.434965	-0.279563	-1.24401	0.176494	1.31692	-0.502329	-0.991082	1.08843	0.437086	-0.28282	-1.24269
748.522	[M-H]-	PC P-36:5	oxidative	0.561686	0.679626	0.231456	-1.47277	-0.0233042	0.955471	0.442779	-1.37495	-0.0599042	0.898563	0.539138	-1.3778
830.51	[M+K]+	PE 40:6	oxidative	0.529606	0.687493	0.259265	-1.47636	-0.0405617	1.19947	0.0869179	-1.24582	-0.240165	1.12611	0.357579	-1.24352
810.506	[M+H]+	PE 42:11	oxidative	0.287508	0.760505	0.421987	-1.47	-0.817159	1.09469	0.601306	-0.878832	0.157537	0.504119	0.787687	-1.44934
766.538	[M-H]-	#N/A	oxidative	0.642234	0.604455	0.226671	-1.47336	-1.24022	-0.338241	1.01472	0.563735	-0.566947	0.188982	1.32288	-0.944911
790.539	[M-H]-	#N/A	oxidative	0.725977	0.665588	0.0328199	-1.42439	0.245297	0.903409	0.281194	-1.4299	0.488731	0.847799	0.0897669	-1.4263
814.536	[M+H]+	PE 42:9	oxidative	0.582958	0.641869	0.253052	-1.47788	0.176258	1.23617	-0.235405	-1.17703	0.226747	0.80722	0.42175	-1.45572
747.519	[M-H]-	PG 34:1	oxidative	0.603199	0.692063	0.164264	-1.45953	0.274934	0.911624	0.240206	-1.42676	0.154926	0.81257	0.477424	-1.44492
745.503	[M-H]-	PG 34:2	oxidative	0.509575	0.736053	0.220621	-1.46625	0.35386	1.18647	-0.39549	-1.14484	0.174212	0.852721	0.412607	-1.43954
837.547	[M-H]-	PI 34:0	oxidative	0.56075	0.830325	0.0216005	-1.41268	0.246105	1.19976	-0.246105	-1.19976	-0.190527	1.33369	-0.0560373	-1.08712
835.532	[M-H]-	PI 34:1	oxidative	0.828444	0.646075	-0.101193	-1.37333	-0.700764	0.878423	0.838943	-1.0166	0.153668	0.891277	0.381976	-1.42692
861.548	[M-H]-	PI 36:2	oxidative	0.868869	0.622259	-0.134775	-1.35635	1.21699	0.0997534	-0.0917732	-1.22497	0.823221	0.639554	-0.0819941	-1.38078
909.548	[M-H]-	PI 40:6	oxidative	0.8492	0.702996	-0.237581	-1.31461	0.13896	0.917139	0.361297	-1.4174	0.0216304	1.40597	-0.670541	-0.757063
732.481	[M-H]-	PC 30:2;O2	oxidative	0.863044	0.863044	-0.76151	-0.964579	1.15618	0.455463	-0.525535	-1.0861	-0.221969	1.10984	0.369948	-1.25782
834.528	[M-H]-	PS 40:6	oxidative	0.904045	0.651956	-0.254987	-1.30101	-0.0376533	1.39317	-0.414186	-0.941332	0.219561	1.07785	0.0399202	-1.33733
379.281	[M+Na]+	MG 18:1	oxidative	0.229224	-0.0243855	1.1071	-1.31194	-0.155819	1.15848	0.250665	-1.25332	0.983499	0.375111	0.016796	-1.37541
377.265	[M+Na]+	MG 18:2	oxidative	0.0773871	0.0442212	1.16081	-1.28241	-0.517951	1.345	0.125311	-0.952362	1.09596	0.258597	-0.0390841	-1.31547
346.055	[M-H]-	Adenosine monophosphate	oxidative	0.746303	0.766743	-0.160503	-1.35254	0.859497	0.742136	-0.338276	-1.26336	1.03697	0.187874	0.142329	-1.36717
362.05	[M-H]-	Guanosine 3'-phosphate	oxidative	0.555468	0.62792	0.301885	-1.48527	0.601522	1.05902	-0.567634	-1.09291	0.985973	0.237302	0.170456	-1.39373
146.045	[M-H]-	L-Glutamate	oxidative	0.501468	0.467054	0.530966	-1.49949	0.84626	0.643332	-0.128142	-1.36145	1.23675	-0.0530297	0.0274292	-1.21115
151.026	[M-H]-	Xanthine	oxidative	0.608591	0.0960933	0.736715	-1.4414	0.373364	0.664298	0.450947	-1.48861	1.41131	-0.156813	-0.313625	-0.940875
594.341	[M-H]-	PS 22:0	everywhere	0.354618	0.394763	0.729308	-1.47869	0.271244	0.736235	0.464991	-1.47247	-0.36041	1.1306	0.419655	-1.18985
149.009	[M-H]-	Tartaric cid	everywhere	0.6549	0.564569	0.258833	-1.4783	-0.220657	0.139987	1.25039	-1.16972	-1.47209	0.482451	0.259781	0.729861
167.021	[M-H]-	Uric cid	everywhere	0.3	1.1	-0.1	-1.3	-0.766812	1.20499	0.438178	-0.876356	1.14276	-0.275839	0.35465	-1.22157
323.028	[M-H]-	Uridine monophosphate	everywhere	0.62248	0.602319	0.253528	-1.47833	-0.952607	0.411125	-0.671839	1.21332	0.693103	0.627093	0.13202	-1.45222
347.183	[M+Na]+	12-oxo-14,18-dihydroxy-9Z,13E,15Z-octadecatrienoic cid	everywhere	-0.222824	-0.323252	-0.888159	1.43424	-1.42611	0.0403616	0.739962	0.645785	0.96684	0.539924	-1.31842	-0.188346
351.22	[M-H]-	20-hydroxy LTB4	everywhere	-0.421327	-1.0808	0.238142	1.26398	0.357752	-1.21636	1.14481	-0.286201	0.49458	-1.48374	0.314733	0.674427
297.243	[M-H]-	9-hydroxy-12Z-octadecenoic cid	everywhere	0.415705	0.581988	0.498847	-1.49654	0.663895	0.875777	-0.218944	-1.32073	-0.023531	0.988304	0.400028	-1.3648
426.022	[M-H]-	ADP	everywhere	-0.685496	-0.180722	-0.597005	1.46322	-0.104771	1.31214	-1.12255	-0.084815	0.893834	0.358941	0.175952	-1.42873
557.225	[M+H]+	Asp Glu Phe Phe	everywhere	-0.0807922	-0.632872	-0.724437	1.4381	-1.27474	-0.115886	0.251086	1.13954	-0.757582	-0.564743	-0.123968	1.44629
143.107	[M-H]-	Caprylic cid	everywhere	-0.298779	-0.920238	1.42219	-0.20317	0.68117	-0.408702	0.943546	-1.21601	-0.76449	0.320592	-0.830252	1.27415
258.171	[M-H]-	CAR 6:0	everywhere	-0.151911	-1.21529	0.151911	1.21529	1.25831	-1.12585	-0.331133	0.19868	1.40943	-0.134231	-0.939618	-0.335578
256.155	[M-H]-	CAR 6:1	everywhere	-0.586248	-1.05525	1.13341	0.508081	-0.445725	-1.17986	1.02255	0.60304	1.17851	-0.707107	-0.942809	0.471405
184.094	[M+Na]+	Carnitine	everywhere	1.35873	-0.339683	5.75446e-16	-1.01905	-1.20762	-0.0883628	0.0589085	1.23708	0.40032	-1.04083	-0.560449	1.20096
322.044	[M-H]-	Cytidine 2'-phosphate	everywhere	0.661619	0.641869	0.154707	-1.45819	-0.837098	0.382859	-0.785185	1.23942	-1.42259	0.909522	0.349816	0.163247
667.524	[M+Na]+	DG 38:4	everywhere	0.392232	-1.37281	-5.31574e-15	0.980581	1.43195	-0.0579403	-0.653898	-0.720116	0.612309	-1.18713	1.01218	-0.437363
171.139	[M-H]-	FA 10:0	everywhere	0.0921673	-1.41602	0.896536	0.427321	0.0905787	-0.617582	1.37515	-0.848146	-0.798107	0.516422	-0.873223	1.15491
199.17	[M-H]-	FA 12:0	everywhere	-0.501772	-1.12215	1.1039	0.520019	-0.507331	-0.0149215	1.40262	-0.880368	-0.45517	0.573911	-1.16761	1.04887
267.073	[M-H]-	Inosine	everywhere	0.798904	0.925102	-0.762401	-0.961605	-0.537152	0.0513362	-0.895254	1.38107	-1.39718	0.978594	0.245497	0.173092
347.039	[M-H]-	Inosine 5'-monophosphateIMP	everywhere	0.411002	1.22147	-0.758796	-0.873678	-0.844287	0.304724	-0.742335	1.2819	-1.23602	0.825699	0.799422	-0.389099
145.061	[M-H]-	L-Glutamine	everywhere	-0.505239	-0.761416	-0.192133	1.45879	-1.16481	0.37844	-0.37844	1.16481	1.41154	-0.209696	-0.253513	-0.948327
431.228	[M-H]-	LPA 18:3	everywhere	-1.06338	-0.607644	0.607644	1.06338	1.15488	0.182349	-0.0607831	-1.27644	1.1364	0.540258	-0.763813	-0.91285
518.322	[M+Na]+	LPC 16:0	everywhere	1.11005	0.0917393	0.119261	-1.32105	-1.38727	0.752064	0.710116	-0.0749067	-0.0244331	1.27866	-0.089588	-1.16464
522.356	[M-H]-	LPC 18:0	everywhere	-0.660849	-0.821663	0.113073	1.36944	0.827788	-0.46788	-1.1877	0.827788	0.397427	-1.28863	-0.180649	1.07185
180.066	[M-H]-	L-Tyrosine	everywhere	-0.804084	-0.482451	-0.160817	1.44735	-1.17364	0.167663	-0.234728	1.24071	1.4264	-0.144707	-0.888916	-0.392777
353.267	[M+Na]+	MG 16:0	everywhere	0.247175	-0.396264	1.25157	-1.10248	-1.00818	1.09297	0.584267	-0.66905	0.533652	0.673927	0.2714	-1.47898
427.284	[M+Na]+	MG 22:5	everywhere	0.323237	-0.785004	-0.811391	1.27316	-1.13022	-0.37206	0.27378	1.2285	-0.953686	0.4604	-0.6906	1.18389
688.392	[M+K]+	ox PC 16:0/9:0CHO	everywhere	0.866976	0.570574	-1.38568	-0.0518704	-1.09985	0.953206	0.733236	-0.586588	-0.869781	0.545456	1.13514	-0.810813
669.456	[M-H]-	PA 34:3	everywhere	-1.24822	-0.30362	0.506033	1.0458	-0.307669	-0.970341	1.39634	-0.118334	1.13645	-1.19788	0.399292	-0.337862
756.551	[M+Na]+	PC 32:0	everywhere	-0.502279	0.918201	0.745487	-1.16141	-1.40315	-0.0180068	0.813078	0.608077	0.91632	0.471808	0.00389924	-1.39203
784.585	[M+Na]+	PC 34:0	everywhere	0.708065	0.531697	0.230835	-1.4706	1.10122	0.491314	-0.423546	-1.16899	0.392883	0.183768	0.861807	-1.43846
798.541	[M+K]+	PC 34:1	everywhere	-1.30421	0.147103	0.0272121	1.12989	-1.01715	0.0901539	1.33746	-0.410466	-1.41155	0.813957	0.587286	0.0103033
780.551	[M+Na]+	PC 34:2	everywhere	-0.041605	0.611208	0.824809	-1.39441	-0.493251	1.01655	0.628971	-1.15227	0.521152	0.0607348	0.839414	-1.4213
846.541	[M+K]+	PC 38:5	everywhere	-1.43256	0.190154	0.885604	0.356805	-1.37251	-0.0281497	0.959649	0.441012	-1.0971	0.809585	-0.597731	0.885247
828.551	[M+Na]+	PC 38:6	everywhere	-0.332428	0.323665	1.18436	-1.1756	-1.43509	0.0683745	0.652595	0.714119	0.780213	0.937832	-0.725047	-0.992999
664.419	[M-H]-	PC 16:0/9:0(COOH)	everywhere	-0.17355	-0.394431	1.43573	-0.867748	0.869441	0.276013	0.296714	-1.44217	0.322835	0.0180467	1.02064	-1.36152
806.512	[M+K]+	PE 38:4	everywhere	-1.37594	-0.0581384	0.910834	0.523245	-0.892847	-0.469123	1.40737	-0.045399	-1.3667	0.621229	0.856642	-0.111167
786.506	[M+Na]+	PE 38:6	everywhere	0.701064	0.9778	-0.571921	-1.10694	0.0208514	1.31364	-1.10513	-0.229366	1.15021	-0.183367	-1.25023	0.283386
816.548	[M+Na]+	PE 40:5	everywhere	-0.363536	0.713608	0.896722	-1.24679	0.511105	1.15472	-0.92756	-0.738262	1.04581	-0.134078	0.402235	-1.31397
245.043	[M-H]-	Phosphatidyl glycerol	everywhere	0.254959	0.330503	0.859307	-1.44477	0.272233	1.03448	0.0544466	-1.36116	1.43787	-0.0813888	-0.623981	-0.732499
184.001	[M-H]-	Phospho-L-serine	everywhere	1.09329	-0.206839	-1.27058	0.384129	0.764265	0.411527	-1.46974	0.293948	0.0647298	-0.453108	-0.970947	1.35933
887.56	[M-H]-	PI 38:3	everywhere	0.915638	0.607429	-0.199052	-1.32402	-1.16817	0.0934539	1.26163	-0.186908	-0.134547	1.11307	0.305789	-1.28431
885.549	[M-H]-	PI 38:4	everywhere	0.843645	0.637208	-0.113624	-1.36723	-1.43309	0.120541	0.843784	0.468769	-0.155469	0.790864	0.718763	-1.35416
317.25	[M-H]-	Pregnanolone	everywhere	-0.297895	-1.1759	1.20726	0.266538	1.4187	-0.373342	-0.134403	-0.910955	1.18762	0.452428	-0.678642	-0.961409
152.995	[M-H]-	Propanoyl phosphate	everywhere	-0.0654501	-0.589051	-0.776051	1.43055	0.739056	0.136862	0.574821	-1.45074	-0.0411049	1.00022	0.397347	-1.35646
227.201	[M-H]-	FA 14:0	everywhere	0.427876	0.216495	0.809725	-1.4541	0.231861	0.539523	0.700042	-1.47143	0.459374	0.139294	0.838728	-1.4374
255.233	[M-H]-	FA 16:0	everywhere	-0.72615	-0.981231	0.691951	1.01543	1.32895	-0.0317488	-0.206163	-1.09104	-1.43914	0.211282	0.358547	0.869306
283.264	[M-H]-	FA 18:0	everywhere	-0.616399	-0.899857	0.183326	1.33293	1.25774	-1.03756	-0.508416	0.288235	-0.00672069	-1.13793	-0.152229	1.29688
299.201	[M-H]-	FA 20:6	everywhere	-0.558105	-0.981495	0.250185	1.28942	-0.0165961	-1.34429	1.04556	0.315326	-1.37107	-0.0323875	0.442629	0.96083
339.326	[M-H]-	FA 22:0	everywhere	-0.391893	-0.82171	-0.240192	1.4538	-0.280353	-1.02796	1.36439	-0.0560707	1.26491	-0.948683	-0.632456	0.316228
337.311	[M-H]-	FA 22:1	everywhere	0.4177	0.902771	0.0943194	-1.41479	1.34394	0.180116	-0.762029	-0.762029	-1.47563	0.618814	0.618814	0.238005
367.358	[M-H]-	FA 24:0	everywhere	-0.556907	-0.831076	-0.0257034	1.41369	-0.37294	-0.903905	1.42223	-0.145383	0.0842271	-1.33079	0.151609	1.09495
540.053	[M-H]-	cyclic denosine diphosphate ribose	glycolytic	0.144759	0.974941	-1.39701	0.277309	-0.834227	-0.320049	-0.299063	1.45334	-0.915963	-0.30019	-0.207824	1.42398
170.092	[M+H]+	1-methylhistidine	glycolytic	-0.594235	-0.381349	-0.518581	1.49417	-1.27322	-0.262387	0.51187	1.02374	-1.33072	0.104028	0.130659	1.09603
332.957	[M+K]+	2-Deoxy-D-ribose 1,5-bisphosphate	glycolytic	-0.0261313	-0.668214	-0.727943	1.42229	-1.28291	-0.143295	1.11096	0.315249	-0.235217	-0.19431	-0.971548	1.40107
241.13	[M+H]+	Anserine	glycolytic	-0.635821	-0.389199	-0.467012	1.49203	-1.2532	-0.243604	0.394888	1.10191	-1.2862	0.0732542	0.056618	1.15633
175.024	[M-H]-	Ascorbic cid	glycolytic	-0.557155	-0.526392	-0.413594	1.49714	-0.74206	-0.535274	-0.182015	1.45935	-0.563656	-0.486575	-0.448035	1.49827
197.139	[M+Na]+	Butyrylcholine	glycolytic	-0.702343	-0.357171	-0.423621	1.48313	-1.34317	-0.124124	0.505579	0.961711	-1.33826	0.138675	0.114854	1.08473
227.114	[M+H]+	Carnosine	glycolytic	-0.592293	-0.401683	-0.501473	1.49545	-1.22035	-0.258023	0.320038	1.15834	-1.24633	0.0219797	0.0219797	1.20237
152.022	[M+K]+	Creatinine	glycolytic	-0.876018	-0.495141	-0.0380878	1.40925	-1.34372	-0.0453575	1.03188	0.35719	-0.936656	0.0390273	-0.478085	1.37571
557.091	[M+Na]+	Cyanidin 3- 3''-malonylglucoside	glycolytic	-0.45795	-0.302052	-0.71778	1.47778	-1.45218	0.151027	0.54602	0.755134	-0.874461	-0.174892	-0.384763	1.43412
553.371	[M+H]+	Elastin	glycolytic	-0.364328	-0.57102	-0.557939	1.49329	-1.3366	-0.182036	0.642656	0.875983	-0.948343	-0.0982348	-0.355156	1.40173
306.076	[M-H]-	Glutathione	glycolytic	-0.489503	-0.362252	-0.638645	1.4904	-0.86546	-0.185557	-0.386695	1.43771	-0.816544	-0.464944	-0.164234	1.44572
154.062	[M-H]-	Histidine	glycolytic	-0.582411	-0.559866	-0.349446	1.49172	-1.10552	-0.115158	-0.103642	1.32432	-0.727671	-0.266221	-0.479198	1.47309
175.119	[M+H]+	L-Arginine	glycolytic	-0.540114	-0.566897	-0.388346	1.49536	-1.36588	-0.0639348	0.482417	0.947397	-0.944163	0.68593	1.02486	-0.766628
465.243	[+H-H2O]	LPA 22:6	glycolytic	-0.603417	-0.502847	-0.387911	1.49417	-1.04151	-0.511288	0.302985	1.24981	-1.14409	0.216983	-0.315612	1.24272
440.278	[M+H]+	LPC 12:0	glycolytic	0.237686	-0.839825	-0.713059	1.3152	-1.33772	-0.16388	0.583109	0.918492	0.366108	-0.903066	-0.707808	1.24477
667.441	[M-H]-	PA 34:4	glycolytic	-0.677256	-0.810052	0.119516	1.36779	0.344124	-1.4912	0.573539	0.573539	-0.0709476	-1.06421	-0.212843	1.348
744.494	[M+K]+	PC 30:0	glycolytic	-0.890262	-0.265003	-0.279657	1.43492	-1.11375	-0.549451	0.638551	1.02465	-1.07258	-0.0265928	-0.239335	1.3385
770.51	[M+K]+	PC 32:1	glycolytic	-0.688759	-0.406158	-0.390951	1.48587	-1.03482	-0.672178	0.752477	0.954519	-1.00557	-0.161895	-0.21662	1.38409
768.495	[M+K]+	PC 32:2	glycolytic	-0.820627	-0.427433	-0.202119	1.45018	-0.787054	-0.572403	-0.0715504	1.43101	-1.10618	-0.0280757	-0.1853	1.31956
794.51	[M+K]+	PC 34:3	glycolytic	-1.02011	-0.329418	-0.0108968	1.36042	-1.30676	-0.25629	0.7309	0.832151	-0.936232	0.181657	-0.572918	1.32749
820.525	[M+K]+	PC 36:4	glycolytic	-0.905756	-0.385022	-0.128661	1.41944	-1.23503	-0.390892	0.819047	0.806879	-0.931801	-0.283512	-0.202552	1.41786
802.536	[M+Na]+	PC 36:5	glycolytic	-1.01433	-0.251199	-0.111291	1.37682	-1.4892	0.563709	0.328129	0.597363	-0.713637	-0.516771	-0.24116	1.47157
608.356	[M-H]-	PC 16:0/5:0(COOH)	glycolytic	-0.73498	-0.572601	-0.145287	1.45287	-1.31288	-0.246376	0.779629	0.779629	-1.01611	-0.418201	0.0990917	1.33522
754.478	[M+K]+	PE 34:2	glycolytic	-0.153926	-0.392668	-0.882717	1.42931	-1.44485	0.186656	0.421704	0.836494	-1.01052	0.316731	-0.55805	1.25184
768.554	[M+Na]+	PE 36:1	glycolytic	-0.952405	-0.381882	-0.0598129	1.3941	-1.20153	-0.445512	0.850523	0.796522	1.25583	-1.08838	-0.418609	0.251166
774.45	[M+K]+	PE 36:6	glycolytic	-0.164896	-0.58348	-0.710323	1.4587	0.0195641	0.723872	0.676918	-1.42035	-0.417199	-0.146583	-0.868225	1.43201
769.562	[M+K]+	SM d36:1	glycolytic	-0.930519	-0.379187	-0.0977045	1.40741	-1.15832	-0.512335	0.846467	0.824192	-0.815588	-0.265753	-0.37572	1.45706
141		cc

## Sheet: Table S3
						isomer 1				isomer 2				isomer 3		isomer 4
Metabolism	m/z	lipid	adduct	formula	is acyl chain identified?	A.C 1	A.C 2	A.C3	A.C4	A.C 1	A.C 2	A.C3	A.C4	A.C 1	A.C 2
oxidative	834.528	PS 40:6	[M-H]-	C46H78NO10P	Yes	18:0	22:6
oxidative	732.481	PC 30:2;O2	[M-H]-	C38H72NO10P	yes	18:00:00	12:1;O;COOH
oxidative	909.548	PI 40:6	[M-H]-	C49H83O13P	yes	18:0	22:6			18:1	22:5
oxidative	861.548	PI 36:2	[M-H]-	C45H83O13P	yes	18:0	18:2			18:1	same
oxidative	835.532	PI 34:1	[M-H]-	C43H81O13P	yes	18:0	16:1			18:1	16:0
oxidative	837.547	PI 34:0	[M-H]-	C43H83O13P	no
oxidative	745.503	PG 34:2	[M-H]-	C40H75O10P	yes	16:0	18:2			16:1	18:1
oxidative	747.519	PG 34:1	[M-H]-	C40H77O10P	yes	16:0	18:1
oxidative	810.506	PE 42:11	[M+H]+	C47H72NO8P	no
oxidative	790.539	#N/A	[M-H]-	C45H78NO8P	yes	18:0	22:6			18:1	22:5			20:4	20:2
oxidative	904.56	PC O-44:11	[M+K]+		no
oxidative	874.555	PC 40:8	[M+Formate]-	C48H80NO8P	yes	18:2	22:6			20:4	same			22:5	18:1
oxidative	876.575	PC 40:7	[M+Formate]-		yes	22:6	18:1
oxidative	878.592	PC 40:6	[M+Formate]-	C48H84NO8P	yes	22:6	18:0			18:1	22:5			24:6	16:0
oxidative	880.606	PC 40:5	[M+Formate]-		yes	22:5	18:0
oxidative	882.619	PC 40:4	[M+Formate]-		yes	22:4	18:0
oxidative	854.59	PC 38:4	[M+Formate]-	C46H84NO8P	yes	18:0	20:4			18:1	20:3			16:0	22:4	18:2	20:2
oxidative	856.604	PC 38:3	[M+Formate]-	C46H86NO8P	yes	18:0	20:3
oxidative	858.624	PC 38:2	[M+Formate]-	C48H86NO8P	yes	20:2	18:0
oxidative	830.592	PC 36:2	[M+Formate]-	C44H84NO8P	yes	18:1	same			18:2	18:0
oxidative	832.605	PC 36:1	[M+Formate]-	C44H86NO8P	yes	18:1	18:0
oxidative	834.624	PC 36:0	[M+Formate]-	C48H82NO8P	yes	18:0	18:0
oxidative	622.372	PC 22:1;O2	[M-H]-	C30H58NO10P	yes	18:0	4:1(COOH)			16:0	6:1(COOH)
oxidative	636.387	PC 18:0/5:0(COOH)	[M-H]-	C31H59O10NP	Yes	18:0	5:0(COOH)			16:0	7:0(COOH)			14:00:00	9:0(COOH)
oxidative	888.554	PC18:0_22:6;O	[M+K]+		no
oxidative	732.422	ox PC 18:0/9:0(COOH)	[M+K]+		yes	18:0	9:0(COOH)
oxidative	599.32	LPI 18:0	[M-H]-	C27H53O12P	Yes	18:0
oxidative	524.278	LPE 22:6	[M-H]-	C27H44NO7P	Yes	22:6
oxidative	480.309	LPE 18:0	[M-H]-	C23H48NO7P	Yes	18:0
oxidative	568.34	LPC 20:3	[M+Na]+	C28H52NO7P	yes	20:3
oxidative	542.322	LPC 18:2	[M+Na]+	C26H50NO7P	yes	18:2
oxidative	546.353	LPC 18:0	[M+Na]+	C26H54NO7P	yes	18:0
oxidative	723.478	CL 72:8	[M-2H]2-	C81H142O17P2	yes	18:2	same	same	same	18:0	20:4	18:2	16:0
oxidative	724.484	CL 72:7	[M-2H]2-	C81H144O17P2	yes	18:2	same	same	18:1
glycolytic	775.596	SM d36:1	[M+Formate]-	C41H83N2O6P	yes	16:0
glycolytic	744.554	PE 36:1	[M-H]-	C41H80NO8P	yes	20:1	16:0			18:1	18:0
glycolytic	774.45	PE 36:6	[M+K]+	C41H70NO8P	no
glycolytic	714.51	PE 34:2	[M-H]-	C39H74NO8P	yes	16:0	18:2
glycolytic	824.544	PC 36:5	[M+Formate]-	C44H78NO8P	yes	20:4	16:1			20:5	16:0
glycolytic	826.561	PC 36:4	[M+Formate]-	C44H80NO8P	yes	16:0	20:4			18:2	same
glycolytic	800.546	PC 34:3	[M+Formate]-	C42H78NO8P	yes	18:2	16:1
glycolytic	774.528	PC 32:2	[M+Formate]-	C40H76NO8P	yes	16:0	16:2			16:1	same
glycolytic	744.494	PC 30:0	[M+K]+	C38H76NO8P	yes	16:0	14:0
glycolytic	608.356	PC 16:0/5:0 COOH	[M-H]-	C29H55NO10P	yes	16:0
glycolytic	776.544	PC 32:1	[M+Formate]-		yes	16:0	16:1
glycolytic	440.278	LPC 12:0	[M+K]+	C20H42NO7P	yes	12:0
everywhere	594.341	PS 22:0	[M-H]-	C28H54NO10P	yes	16:0	6:0			18:0
everywhere	885.549	PI 38:4	[M-H]-	C47H83O13P	yes	20:4	18:0
everywhere	887.56	PI 38:3	[M-H]-	C47H85O13P	yes	18:0	20:3			18:1	20:2
everywhere	762.507	PE 38:6	[M-H]-	C43H74NO8P	yes	16:0	22:6			18:0	20:6			18:6	20:2
everywhere	766.538	PE 38:4	[M-H]-	C43H78NO8P	Yes	18:0	20:4			18:2	20:2
everywhere	792.557	PE 40:5	[M-H]-	C45H80NO8P	yes	22:5	18:0
everywhere	850.561	PC 38:6	[M+Formate]-	C46H80NO8P	yes	16:0	22:6			18:2	20:4			16:1	22:5
everywhere	852.575	PC 38:5	[M+Formate]-	C46H82NO8P	yes	22:5	16:0
everywhere	802.561	PC 34:2	[M+Formate]-	C42H80NO8P	yes	16:0	18:2
everywhere	804.575	PC 34:1	[M+Formate]-	C42H82NO8P	yes	16:0	18:1			16:1	18:0
everywhere	806.59	PC 34:0	[M+Formate]-	C42H84NO8P	yes	16:0	18:0
everywhere	778.563	PC 32:0	[M+Formate]-	C40H80NO8P	yes	16:0	16:0
everywhere	664.419	PC 16:0/9:0(COOH)	[M-H]-	C33H63NO10P	Yes	16:0
everywhere	778.559	PC 32:0	[M+Formate]-	C40H80NO8P	yes	16:0	16:0
everywhere	518.322	LPC 16:0	[M+Na]+	C24H50NO7P	yes	16:0
count	61
